# Supplementary figures and images for: A century of warming on Caribbean reefs
Source: PLOS journal article supplement (doi:10.1371/journal.pclm.0000002), 2022-03-09

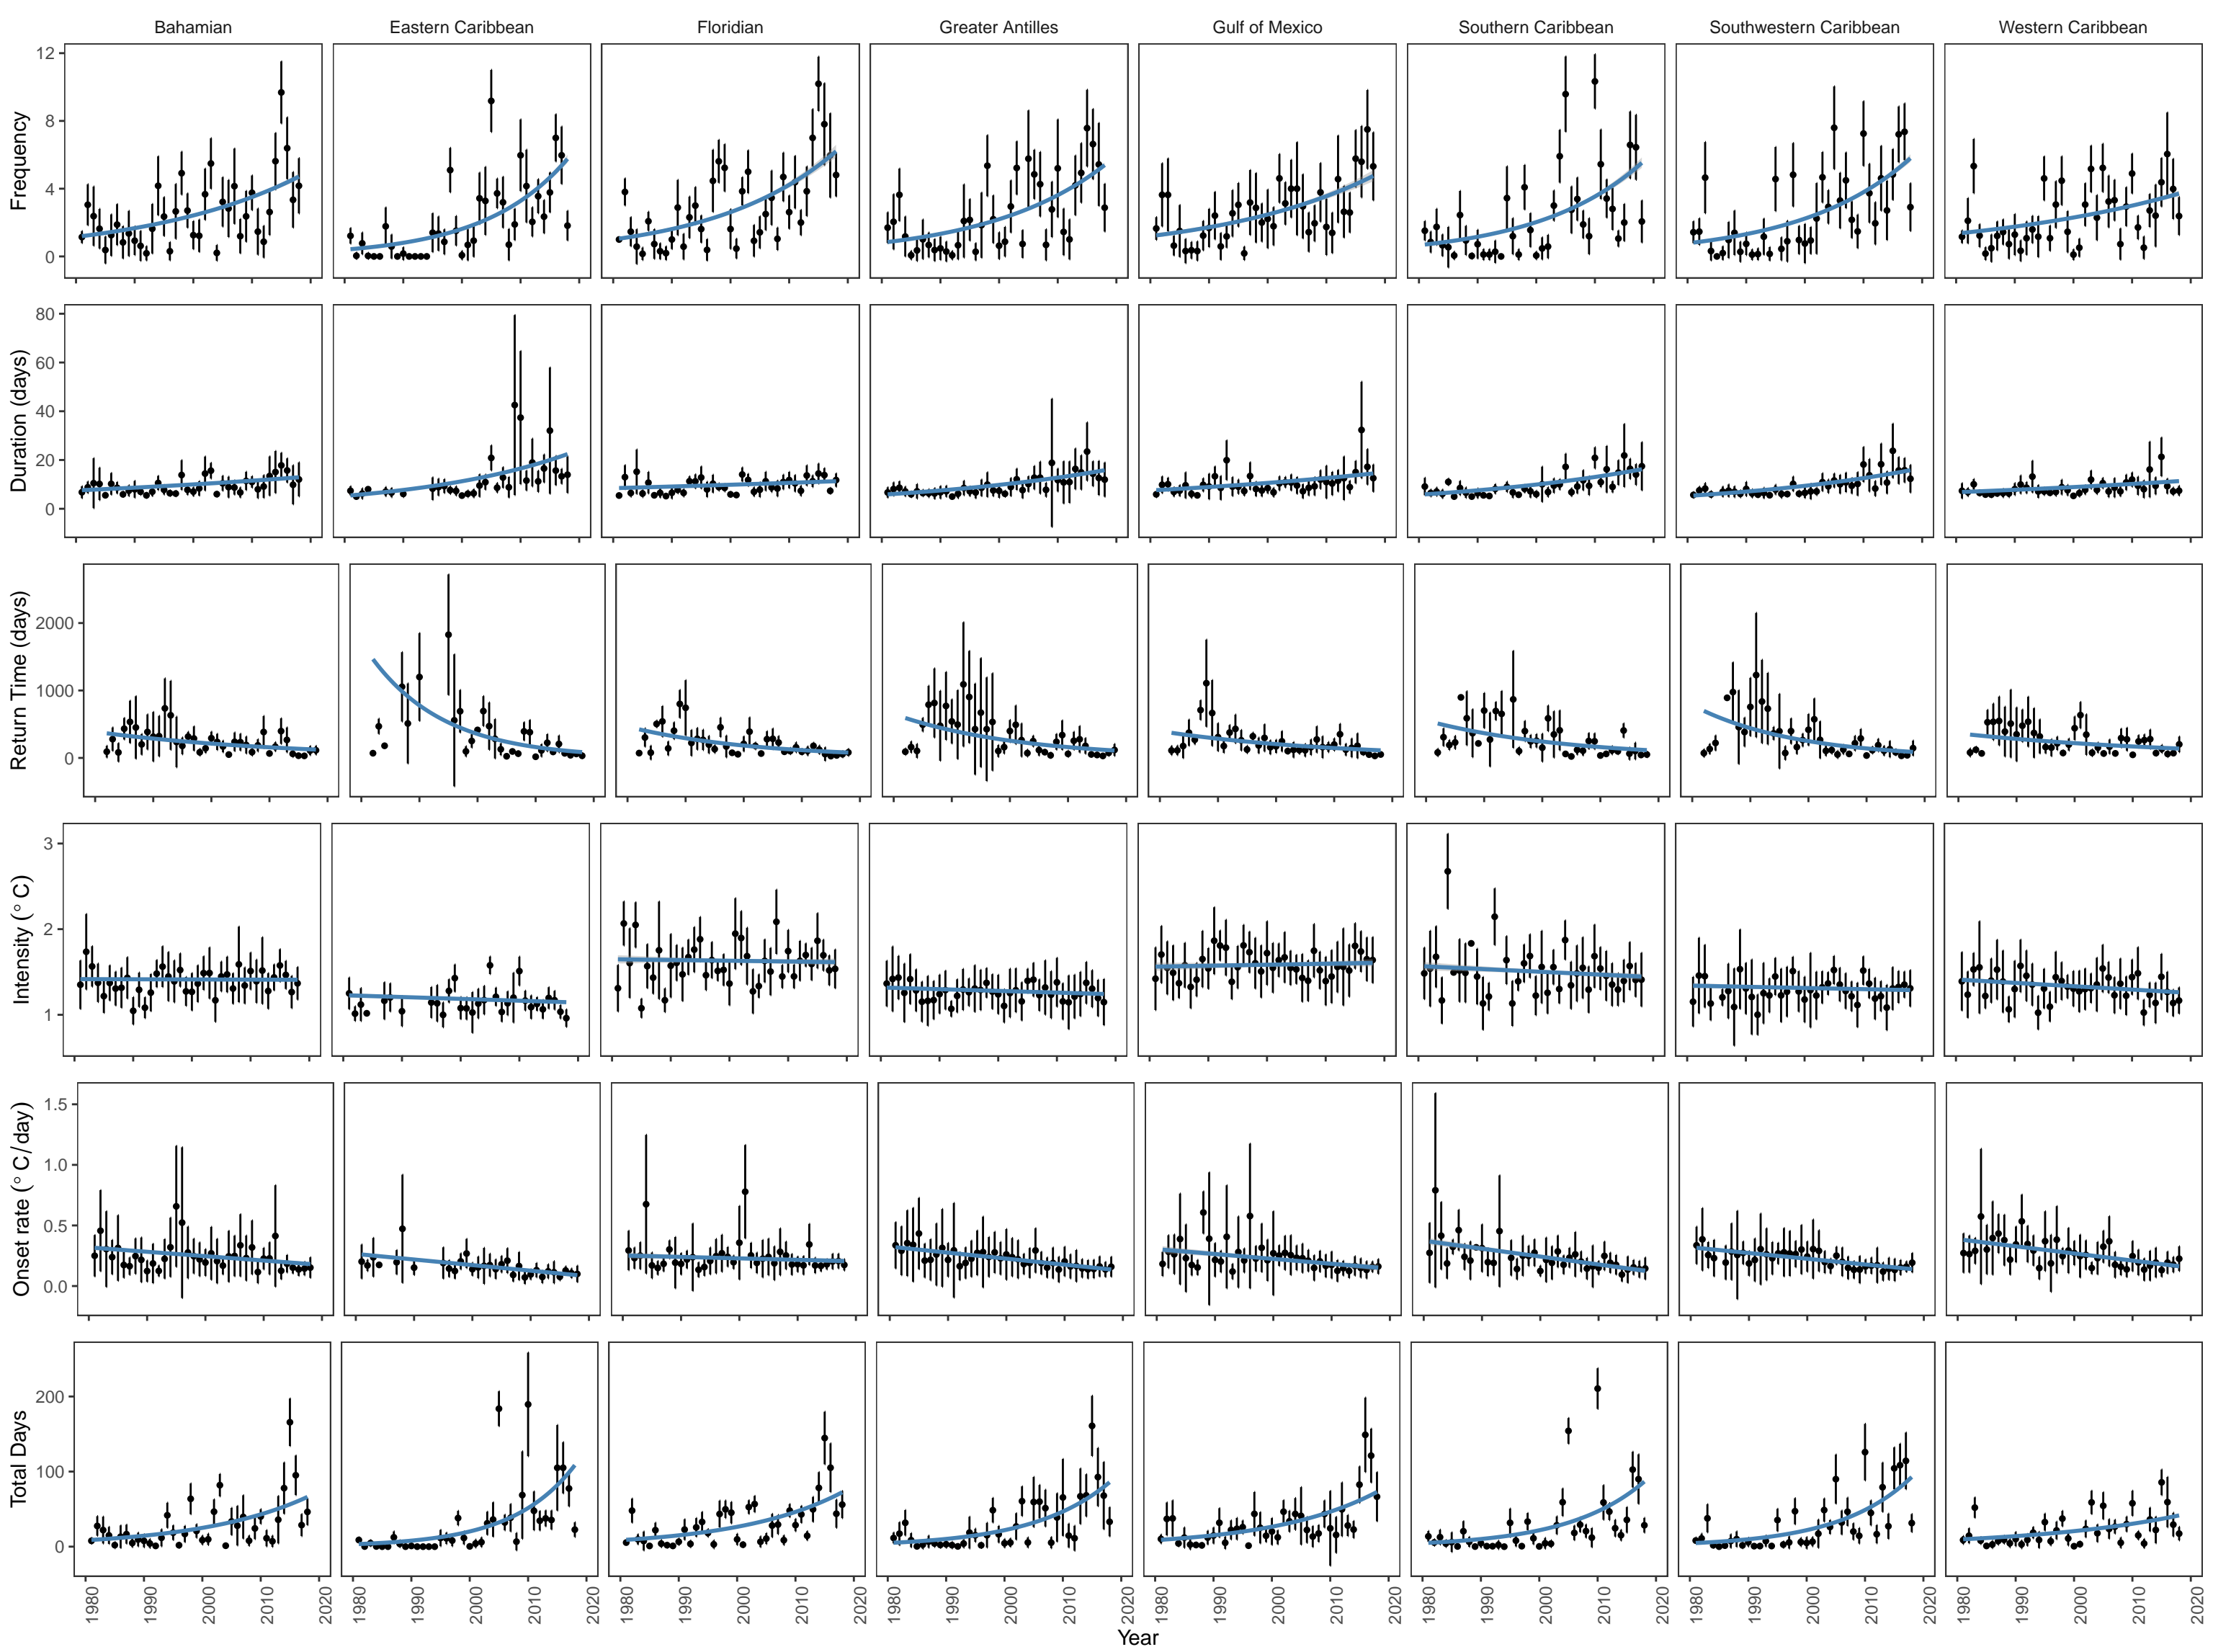

Supplement: S9 (10.1371/journal.pclm.0000002.s009) [file journal.pclm.0000002.s009]
